# Supplementary material for: Rab44 Deficiency Induces Impaired Immune Responses to Nickel Allergy
Source: MDPI journal article supplement (doi:10.3390/ijms24020994), 2023-01-04
Supplement: s1 [file s1]

*Supporting Information for*

**Rab44 deficiency induces impaired immune responses to nickel allergy**

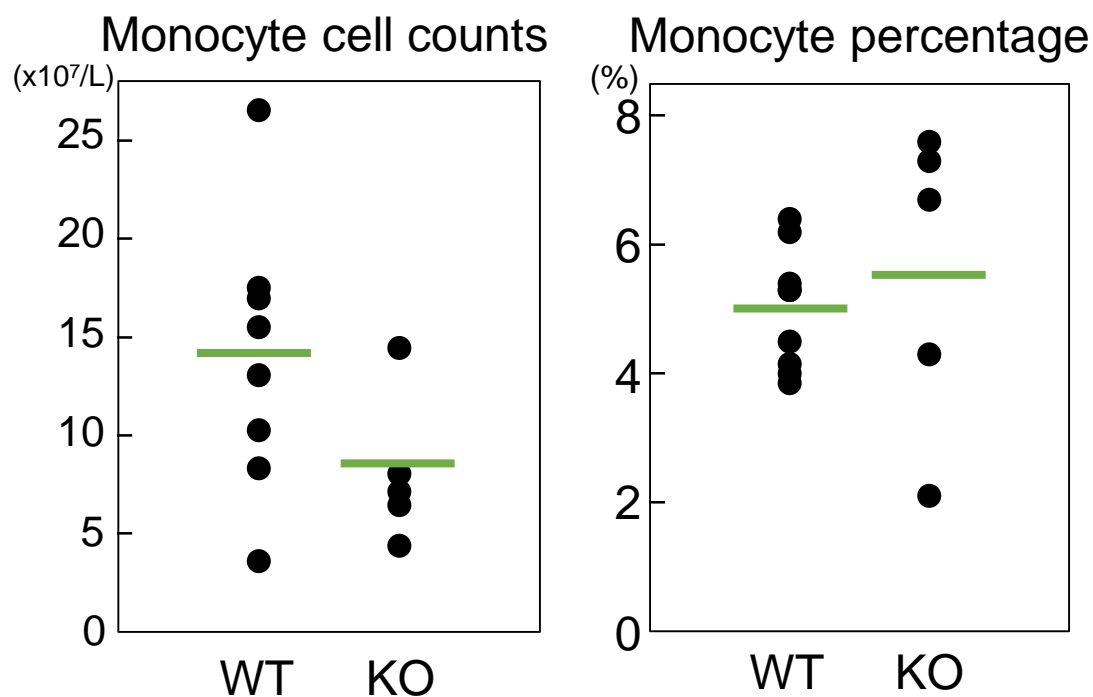

**Figure S1. Different immune responses between wild-type (WT) and Rab44-knockout mice (KO) to LPS administration.**

WT and Rab44-KO female mice were intraperitoneally injected with 0.2 mg of LPS (O55:B5). After 48 h of injection, the blood was analyzed with a haematology counter. Monocyte counts (left panel) and percentages in white blood cells (right panel).

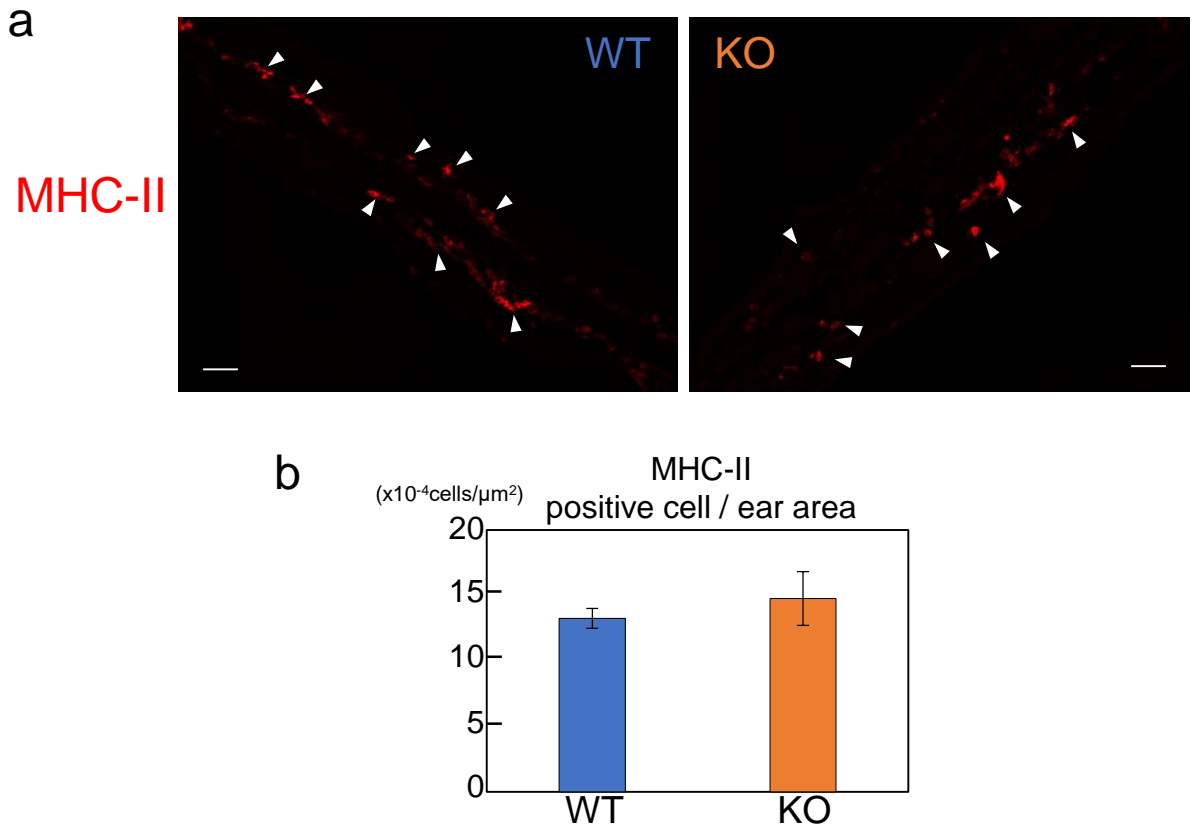

**Figure S2. Immunofluorescence analysis of MHC-II positive cells in nickel - induced ear in wild-type (WT) and Rab44-knockout (KO) mice**

(a) The fixed sections of the nickel-treated ear were blocked with 1.0% bovine serum albumin in PBS. The samples were incubated with mouse anti-MHC-II IgG (1:250), followed by fluorescent labelling with Alexa Fluor Alexa fluor 555-conjugated anti-mouse IgG. Bars: 50  $\mu\text{m}$ . White arrowheads indicate the antibody reactive cells. (b) Quantitative analysis of MHC-II positive cells per  $\mu\text{m}^2$  after visualization by microscopy. Data are represented as the mean  $\pm$  S.E. of values from three independent experiments.
